# Supplementary material for: The Application of ATR-FTIR Spectroscopy and the Reversible DNA Conformation as a Sensor to Test the Effectiveness of Platinum(II) Anticancer Drugs
Source: PubMed Central journal article supplement (PMC6308638; doi:10.3390/s18124297), 2018-12-06
Supplement: sensors-18-04297-s001.pdf [file sensors-18-04297-s001.pdf]

Supplementary Material to:

**The Application of ATR-FTIR Spectroscopy and  
the Reversible DNA Conformation as a Sensor to  
Test the Effectiveness of Platinum(II) Anticancer  
Drugs**

Khansa Al-Jorani , Anja R  ther , Miguela Martin , Rukshani Haputhanthri ,  
Glen B. Deacon , Hsiu Lin Li and Bayden R. Wood\*

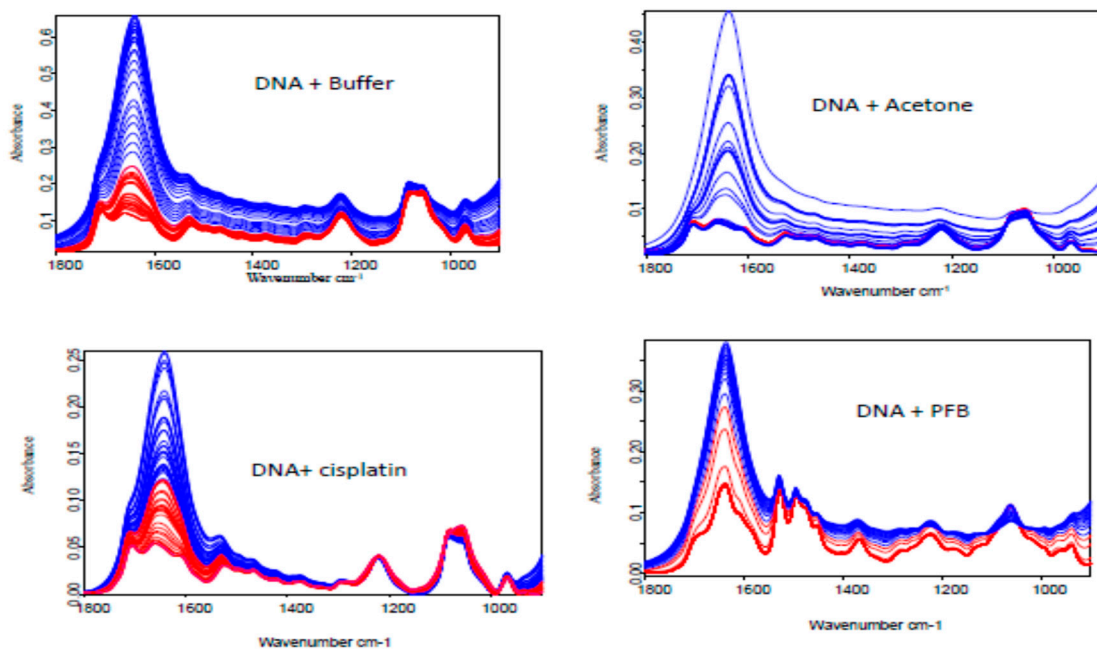

**Figure S1.** FTIR-IR absorbance spectra of the control with buffer and acetone, DNA-drug samples with cisplatin and PFB.

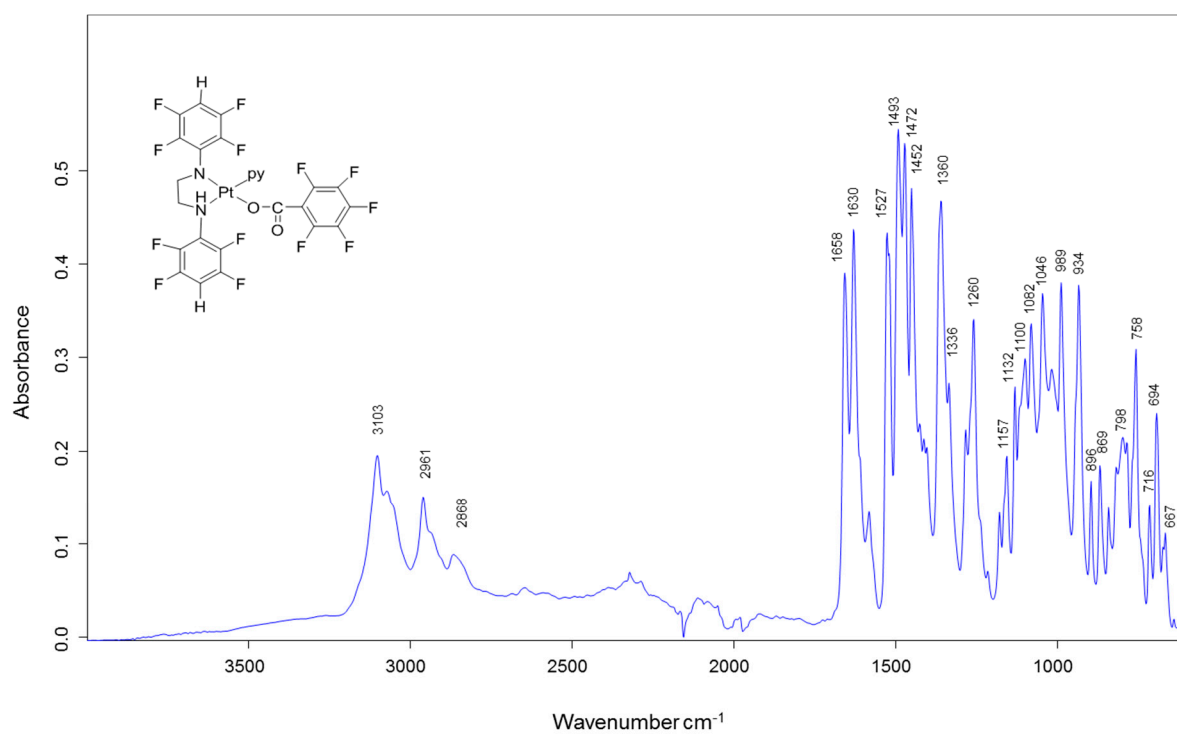

**Figure S2.** ATR-IR spectrum of PFB.

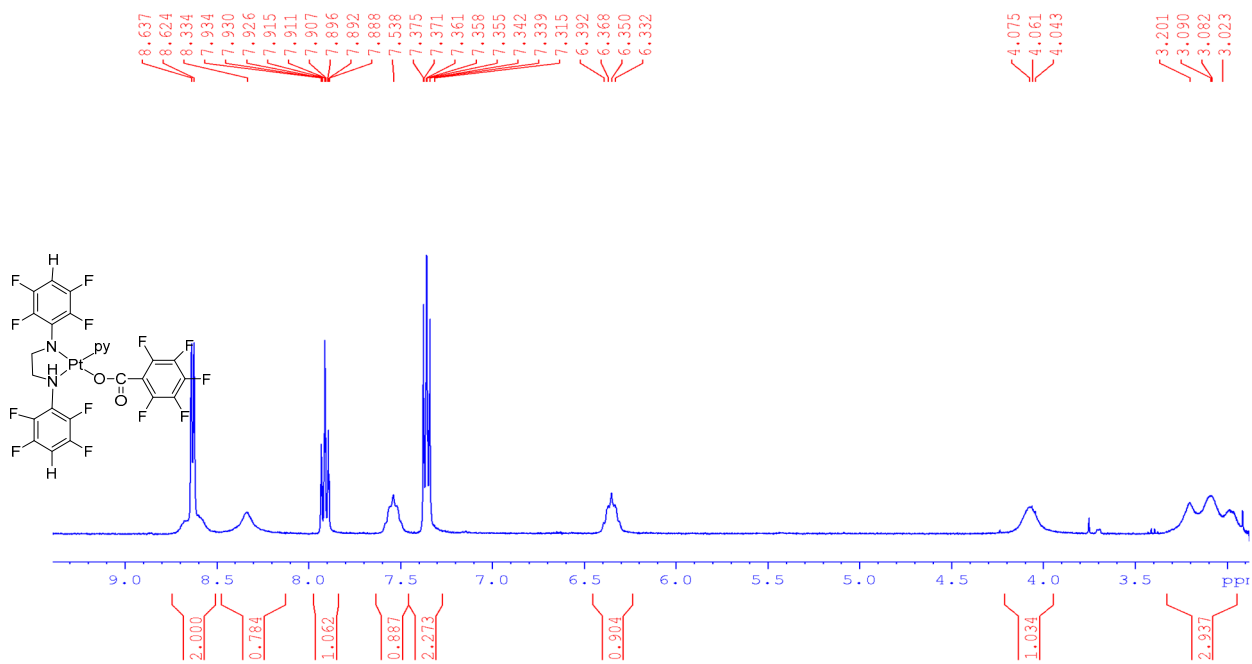

Figure S3.  $^1\text{H}$ NMR spectrum of PFB.

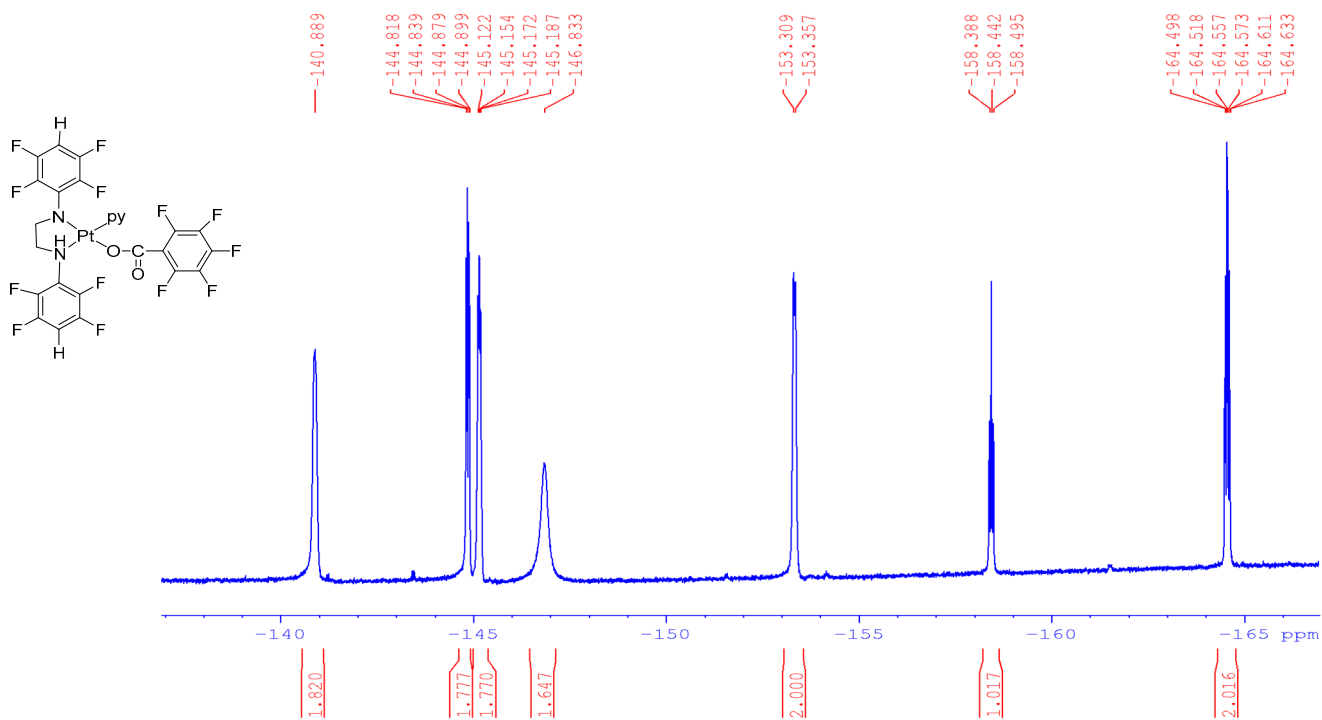

Figure S4.  $^{19}\text{F}$ NMR spectrum of PFB.

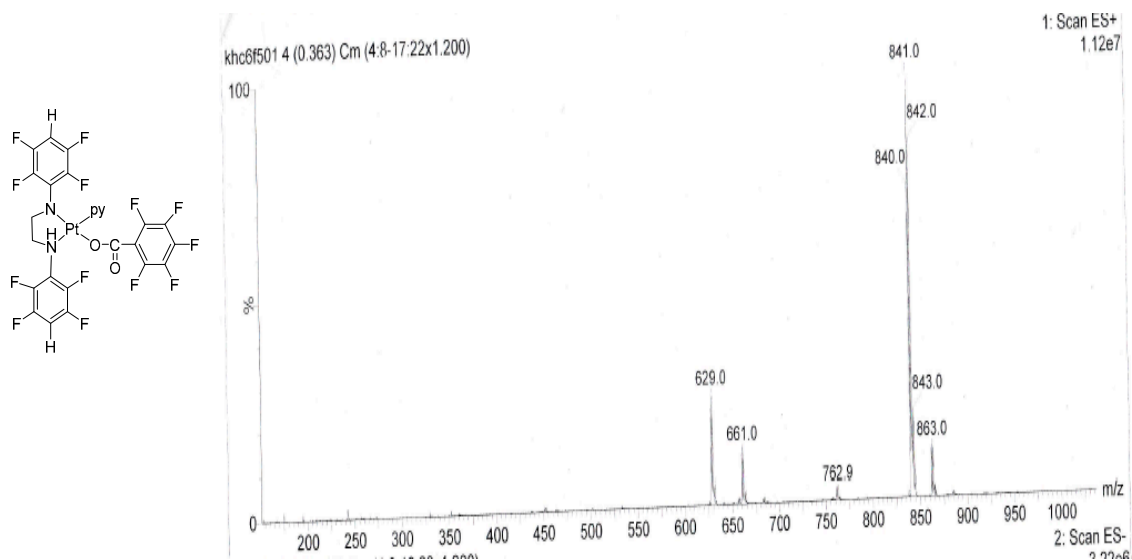

Figure S5. ESMS<sup>+</sup> spectrum of PFB.

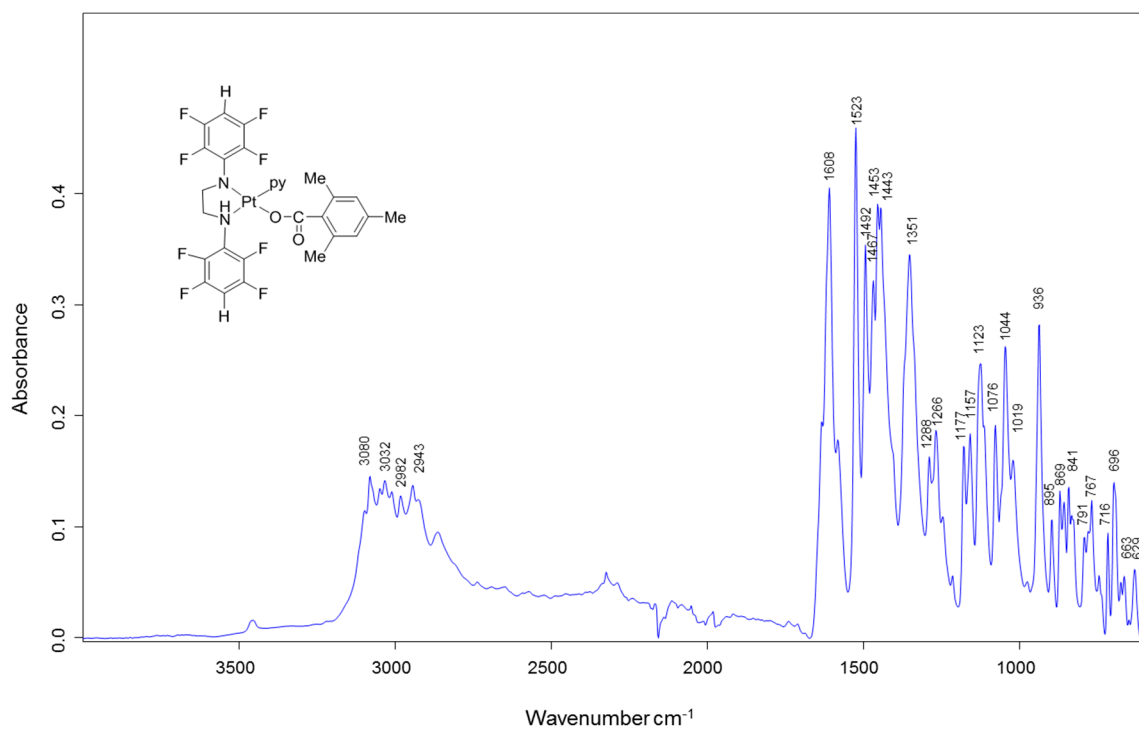

Figure S6. ATR-IR spectrum of TMB.

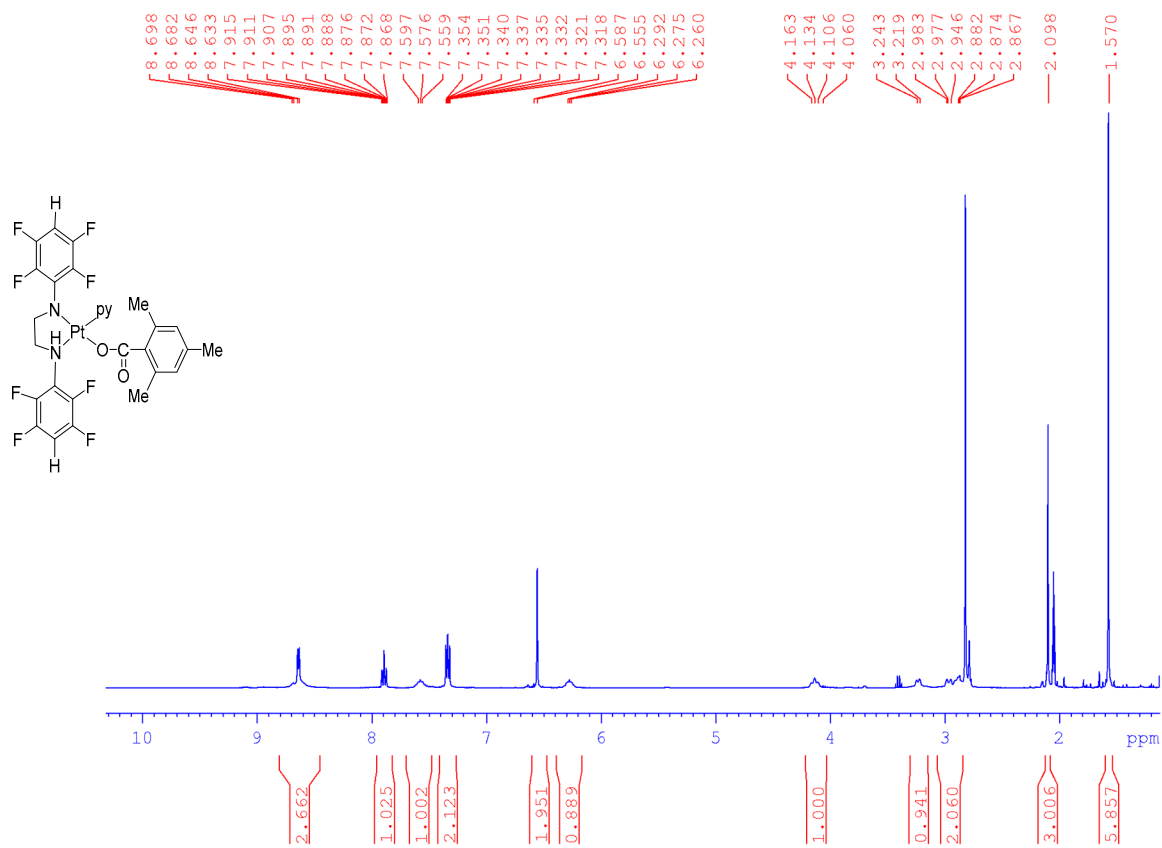

Figure S7. <sup>1</sup>H NMR spectrum of TMB.

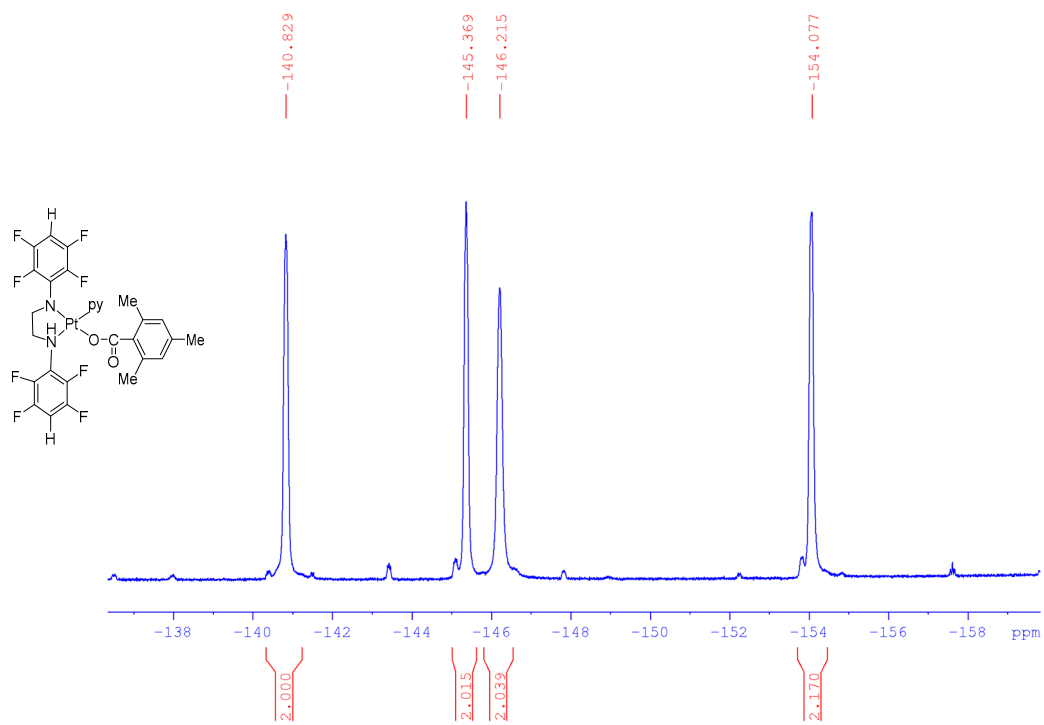

Figure S8. <sup>19</sup>F NMR spectrum of TMB.

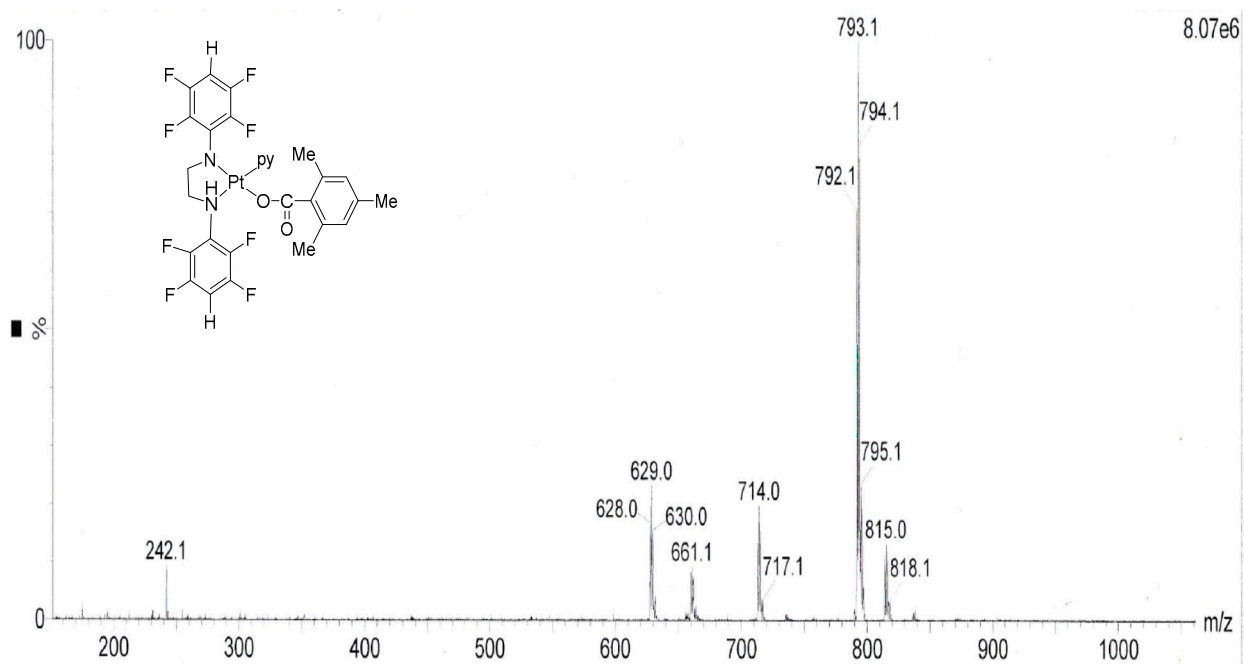

Figure S9. ESMS<sup>+</sup> spectrum of TMB.
